# Supplementary material for: Microfragmented adipose tissue is associated with improved ex vivo performance linked to HOXB7 and b-FGF expression
Source: PubMed Central journal article supplement (PMC8399787; doi:10.1186/s13287-021-02540-1), 2021-08-28

Fig S1

Lipogems derived MSC

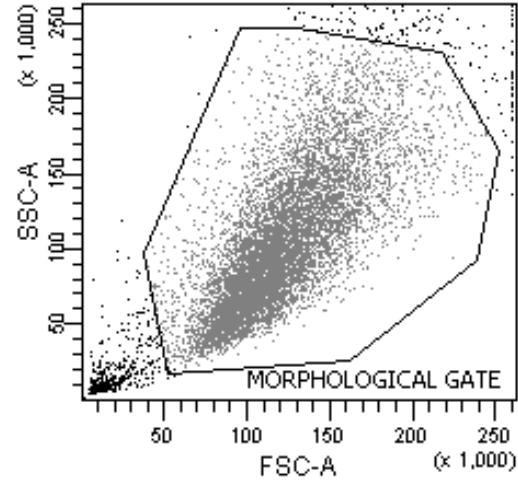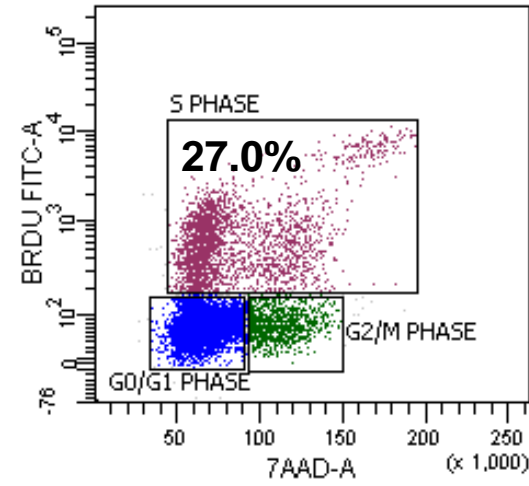

Lipogems derived MSC + SF

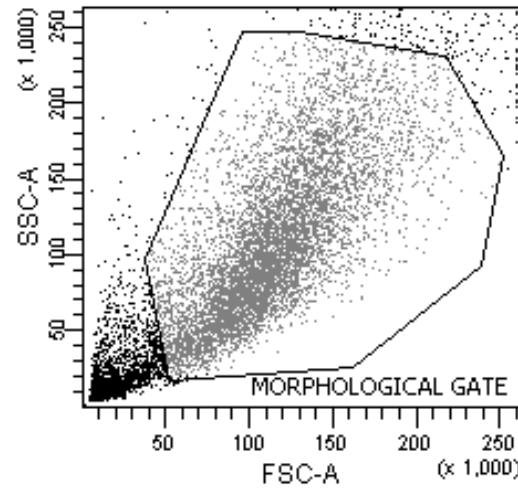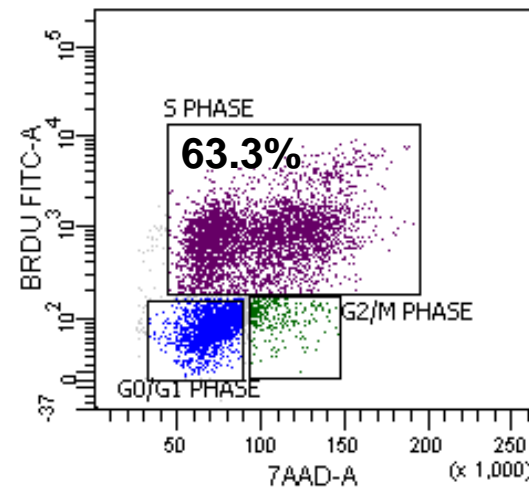

**Fig S2**

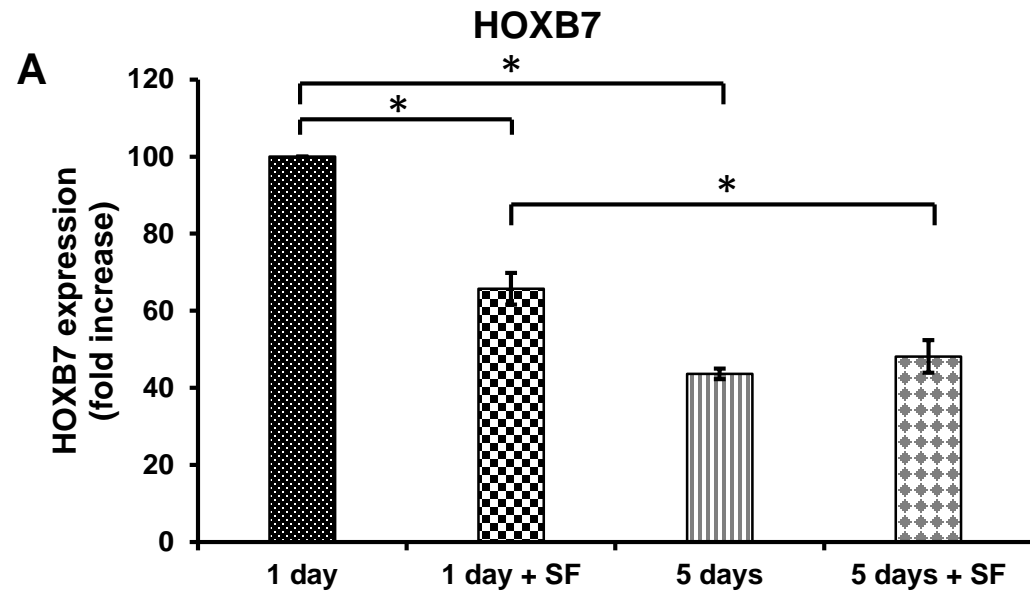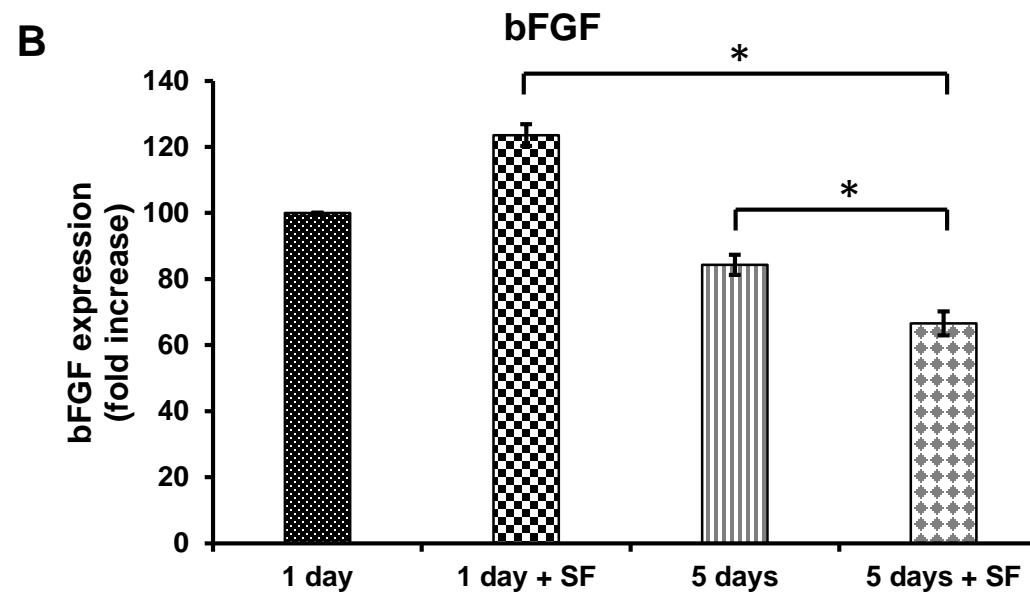

Supplement: 13287_2021_2540_MOESM2_ESM.pdf [file 13287_2021_2540_MOESM2_ESM.pdf]
